# Supplementary material for: Grapevine Virology in the Third-Generation Sequencing Era: From Virus Detection to Viral Epitranscriptomics
Source: MDPI journal article supplement (doi:10.3390/plants10112355), 2021-10-31
Supplement: s1 [file s1]

**Table S1.** List of viruses identified in grapevine (updated from Fuchs 2020).

| Genome   | Family                   | Genus                | Species                                                           | Virion shape            | Disease                                                  |
|----------|--------------------------|----------------------|-------------------------------------------------------------------|-------------------------|----------------------------------------------------------|
| (+)ssRNA | <i>Alphaflexiviridae</i> | <i>Potexvirus</i>    | <i>Potato virus X</i> (PVX)                                       | Filamentous             | None                                                     |
|          | <i>Betaflexiviridae</i>  | <i>Fivirus</i>       | <i>Grapevine Kizil Sapak virus</i> (GKS)                          | Filamentous             | Unknown                                                  |
|          |                          | <i>Foveavirus</i>    | <i>Grapevine rupestris stem pitting-associated virus</i> (GRSPaV) | Filamentous             | Rugose wood                                              |
|          |                          |                      | <i>Grapevine virus T</i> (GVT)                                    |                         | Unknown                                                  |
|          |                          | <i>Trichovirus</i>   | <i>Grapevine berry inner necrosis virus</i> (GINV)                | Filamentous             | Berry inner necrosis<br>leaf deformation and<br>mottling |
|          |                          |                      | <i>Grapevine Pinot gris virus</i> (GPGV)                          |                         |                                                          |
|          |                          | <i>Vitivirus</i>     | <i>Grapevine virus A</i> (GVA)                                    | Flexuous<br>filamentous | Rugose wood                                              |
|          |                          |                      | <i>Grapevine virus B</i> (GVB)                                    |                         |                                                          |
|          |                          |                      | <i>Grapevine virus D</i> (GVD)                                    |                         |                                                          |
|          |                          |                      | <i>Grapevine virus E</i> (GVE)                                    |                         |                                                          |
|          |                          |                      | <i>Grapevine virus F</i> (GVF)                                    |                         |                                                          |
|          |                          |                      | <i>Grapevine virus G</i> (GVG)                                    |                         |                                                          |
|          |                          |                      | <i>Grapevine virus H</i> (GVH)                                    |                         |                                                          |
|          |                          |                      | <i>Grapevine virus I</i> (GVI)                                    |                         |                                                          |
|          |                          |                      | <i>Grapevine virus J</i> (GVJ)                                    |                         |                                                          |
|          |                          |                      | <i>Grapevine virus K</i> (GVK)                                    |                         | Unknown                                                  |
|          |                          |                      | <i>Grapevine virus L</i> (GVL)                                    |                         | Unknown                                                  |
|          |                          |                      | <i>Grapevine virus M</i> (GVM)                                    |                         | Rugose wood                                              |
|          | <i>Bromoviridae</i>      | <i>Alfavirus</i>     | <i>Alfalfa mosaic virus</i> (AMV)                                 | Bacilliform             | Yellow mosaic                                            |
|          |                          | <i>Anulavirus</i>    | <i>Amazon lily mild mottle virus</i> (ALiMMV)                     | Isometric               | None                                                     |
|          |                          |                      | <i>Grapevine line pattern virus</i> (GLPV)                        |                         | Line pattern                                             |
|          |                          | <i>Cucumovirus</i>   | <i>Cucumber mosaic virus</i> (CMV)                                | Isometric               | Unknown                                                  |
|          |                          | <i>Ilarvirus</i>     | <i>Grapevine angular mosaic virus</i> (GaMoV)                     | Isometric               | Angular mosaic                                           |
|          |                          |                      | <i>Grapevine virus S</i> (GVS)                                    | Unknown                 | Unknown                                                  |
|          | <i>Closteroviridae</i>   | <i>Closterovirus</i> | <i>Grapevine leafroll-associated virus 2</i> (GLRaV2)             | Filamentous             | Leafroll/ Incompatibility                                |

| Genome | Family                | Genus                    | Species                                                                                                                                                                                                                                                                                                                                                                                                                                                                                                                                                                                                                                                                               | Virion shape | Disease                                 |
|--------|-----------------------|--------------------------|---------------------------------------------------------------------------------------------------------------------------------------------------------------------------------------------------------------------------------------------------------------------------------------------------------------------------------------------------------------------------------------------------------------------------------------------------------------------------------------------------------------------------------------------------------------------------------------------------------------------------------------------------------------------------------------|--------------|-----------------------------------------|
|        |                       | <i>Ampelovirus</i>       | <i>Grapevine leafroll-associated virus 1</i> (GLRaV1)<br><i>Grapevine leafroll-associated virus 3</i> (GLRaV3)<br><i>Grapevine leafroll-associated virus 4</i> (GLRaV4)<br><i>Grapevine leafroll-associated virus 13</i> (GLRaV13)                                                                                                                                                                                                                                                                                                                                                                                                                                                    | Filamentous  | Leafroll                                |
|        |                       | <i>Velarivirus</i>       | <i>Grapevine leafroll-associated virus 7</i> (GLRaV7)                                                                                                                                                                                                                                                                                                                                                                                                                                                                                                                                                                                                                                 | Filamentous  | Leafroll                                |
|        | <i>Luteoviridae</i>   | <i>Enamovirus</i>        | <i>Grapevine enamovirus 1</i> (GEV1)                                                                                                                                                                                                                                                                                                                                                                                                                                                                                                                                                                                                                                                  | Isometric    | None                                    |
|        |                       | Unassigned               | <i>Grapevine Ajinashika virus</i> (GAgV)                                                                                                                                                                                                                                                                                                                                                                                                                                                                                                                                                                                                                                              | Isometric    | Unknown                                 |
|        | <i>Partitiviridae</i> | <i>Deltapartitivirus</i> | <i>Grapevine cryptic virus</i> (GCV)                                                                                                                                                                                                                                                                                                                                                                                                                                                                                                                                                                                                                                                  | Unknown      | Unknown                                 |
|        | <i>Potyviridae</i>    | <i>Potyvirus</i>         | <i>Bean common mosaic virus</i> (BCMV)                                                                                                                                                                                                                                                                                                                                                                                                                                                                                                                                                                                                                                                | Filamentous  | Unknown                                 |
|        | <i>Secoviridae</i>    | <i>Cheravirus</i>        | <i>Apple latent spherical virus</i> (ALSV)                                                                                                                                                                                                                                                                                                                                                                                                                                                                                                                                                                                                                                            | Isometric    | Unknown                                 |
|        |                       | <i>Fabavirus</i>         | <i>Broad bean wilt virus</i> (BBMV)<br><i>Grapevine fabavirus</i> (GFabV)                                                                                                                                                                                                                                                                                                                                                                                                                                                                                                                                                                                                             | Isometric    | Unknown<br>Shine Muscat showing disease |
|        |                       | <i>Nepovirus</i>         | <i>Artichoke Italian latent virus</i> (AILV)<br><i>Arabid mosaic virus</i> (ArMV)<br><i>Blueberry leaf mottle virus</i> (BBLMV)<br><i>Cherry leafroll virus</i> (CLRV)<br><i>Grapevine Anatolian ringspot virus</i> (GARSV)<br><i>Grapevine Bulgarian latent virus</i> (GBLV)<br><i>Grapevine deformation virus</i> (GDeV)<br><i>Grapevine chrome mosaic virus</i> (GCMV)<br><i>Grapevine fanleaf virus</i> (GFLV)<br><i>Grapevine Tunisian ringspot virus</i> (GTRV)<br><i>Peach rosette mosaic virus</i> (PRSM)<br><i>Raspberry ringspot virus</i> (RpRSV)<br><i>Tobacco ringspot virus</i> (TRSV)<br><i>Tomato ringspot virus</i> (ToRSV)<br><i>Tomato black ring virus</i> (TBRV) | Isometric    | Leaf degeneration                       |
|        |                       | Unassigned               | <i>Strawberry latent ringspot virus</i> (SLRSV)                                                                                                                                                                                                                                                                                                                                                                                                                                                                                                                                                                                                                                       | Isometric    | Leaf degeneration                       |
|        | <i>Tombusviridae</i>  | <i>Carmovirus</i>        | <i>Carnation mottle virus</i> (CarMV)                                                                                                                                                                                                                                                                                                                                                                                                                                                                                                                                                                                                                                                 | Isometric    | Roditis leaf discoloration              |
|        |                       | <i>Necrovirus</i>        | <i>Tobacco necrosis virus D</i> (TNV-D)                                                                                                                                                                                                                                                                                                                                                                                                                                                                                                                                                                                                                                               | Isometric    | Unknown                                 |

| Genome   | Family                | Genus                 | Species                                                                                                                                                      | Virion shape                                         | Disease                                           |
|----------|-----------------------|-----------------------|--------------------------------------------------------------------------------------------------------------------------------------------------------------|------------------------------------------------------|---------------------------------------------------|
|          |                       | <i>Tombusvirus</i>    | <i>Grapevine Algerian latent virus</i> (GALV)<br><i>Petunia asteroid mosaic virus</i> (PAMV)                                                                 | Isometric                                            | Unknown                                           |
|          |                       | <i>Tymoviridae</i>    | <i>Marafivirus</i>                                                                                                                                           | Isometric                                            | Unknown                                           |
|          |                       |                       | <i>Blackberry virus S</i> (BIVS)<br><i>Grapevine asteroid mosaic-associated virus</i> (GAMaV)<br><i>Grapevine Syrah virus 1</i> (GSyV1)                      |                                                      | Asteroid mosaic<br>Unknown                        |
|          |                       | <i>Maculavirus</i>    | <i>Grapevine fleck virus</i> (GFkV)<br><i>Grapevine red globe virus</i> (GRGV)                                                                               | Isometric                                            | Fleck<br>Unknown                                  |
|          |                       | <i>Gratylivirus</i>   | <i>Grapevine-associated tymo-like virus</i> (GaTLV)                                                                                                          | Isometric                                            | Unknown                                           |
|          | <i>Virgaviridae</i>   | <i>Tobamovirus</i>    | <i>Grapevine virga-like virus</i> (GVLV)<br><i>Tobacco mosaic virus</i> (TMV)<br><i>Tomato mosaic virus</i> (ToMV)                                           | Rod                                                  | Unknown                                           |
|          | Unassigned            | <i>Idaeovirus</i>     | <i>Raspberry bushy dwarf virus</i> (RBDV)                                                                                                                    | Isometric                                            | Unknown                                           |
|          |                       | <i>Sobemovirus</i>    | <i>Sowbane mosaic virus</i> (SoMV)                                                                                                                           | Isometric                                            | Unknown                                           |
|          |                       | <i>Virtovirus</i>     | <i>Grapevine virus satellite</i> (GV-Sat)                                                                                                                    | Isometric                                            | Unknown                                           |
|          |                       | <i>Unassigned</i>     | <i>Grapevine labile rod-shaped virus</i> (GLRSV)<br><i>Grapevine stunt virus</i> (GSV)                                                                       | Rod<br>Isometric                                     | Unknown                                           |
| (–)ssRNA | <i>Bunyaviridae</i>   | <i>Tospovirus</i>     | <i>Tomato spotted wilt virus</i> (TSWV)                                                                                                                      | Isometric                                            | Unknown                                           |
|          | <i>Phenuiviridae</i>  | <i>Rubodvirus</i>     | <i>Grapevine Garan dmak virus</i> (GGDV)<br><i>Grapevine Muscat rose virus</i> (GMRV)                                                                        | Isometric                                            | Unknown                                           |
| dsRNA    | <i>Endornaviridae</i> | <i>Endornavirus</i>   | <i>Grapevine endophyte endornavirus</i> (GEEV)                                                                                                               | Does not have any gene for capsid protein, no virion | None                                              |
|          | <i>Reoviridae</i>     | <i>Oryzavirus</i> (?) | <i>Grapevine Cabernet Sauvignon reovirus</i> (GCSV)                                                                                                          | Isometric                                            | Unknown                                           |
| ssDNA    | <i>Geminiviridae</i>  | <i>Begomovirus</i>    | <i>Grapevine begomovirus A</i> (GBVA)                                                                                                                        | Twinned                                              | Unknown                                           |
|          |                       | <i>Grablovirus</i>    | <i>Grapevine red blotch virus</i> (GRBV)<br><i>Wild Vitis latent virus 1</i> (WVV1)                                                                          | Twinned                                              | Red blotch                                        |
|          |                       | Unassigned            | <i>Grapevine geminivirus A</i> (GGVA)<br><i>Temperate fruit-decay-associated virus</i> (TFDaV)                                                               | Twinned                                              | Unknown                                           |
| dsDNA    | <i>Caulimoviridae</i> | <i>Badnavirus</i>     | <i>Grapevine vein clearing virus</i> (GVCV)<br><i>Grapevine badnavirus 1</i> (GBV1)<br><i>Grapevine Roditis leaf discoloration-associated virus</i> (GRLDaV) | Bacilliform                                          | Vein clearing<br>Unknown<br>Roditis discoloration |

1. Fuchs, M. Grapevine viruses: A multitude of diverse species with simple but overall poorly adopted management solutions in the vineyard. *Journal of Plant Pathology* **2020**, *102*, 643-653.
